# Supplementary material for: HLA-DRB1*14:54 Is Associated with Pulmonary Alveolar Proteinosis: A Retrospective Real-World Audit
Source: MDPI journal article supplement (doi:10.3390/biomedicines11112909), 2023-10-27
Supplement: s1 [file s1]

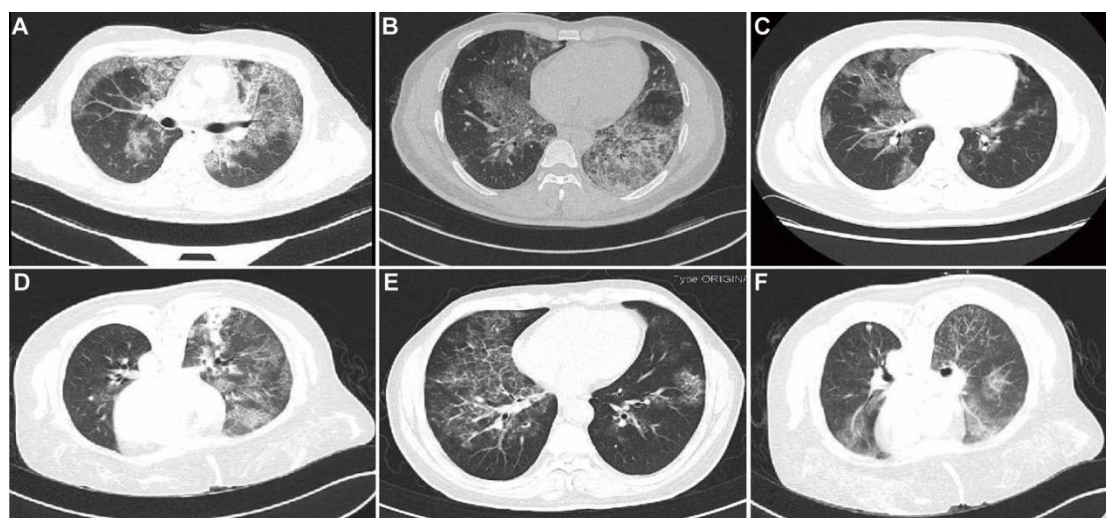

**Supplementary Figure S1.** Thoracic high-resolution computed tomography (HRCT) scans of patients with pulmonary alveolar proteinosis (PAP). HRCT typically reveals ground-glass opacification (GGO) in the lungs of PAP patients. (A–C) Bilateral GGO with sharp demarcation in patients with autoimmune PAP. (D–F) Diffuse GGO  $\pm$  consolidation in patients with secondary PAP.

**Supplementary Table 1.** Primers for amplification and sequencing.

| Amplification primer | Sequence                               |
|----------------------|----------------------------------------|
| Forward primer       | TGTAAACGACGGCCAGTTTCTTGGAGTACTCTA      |
| Reverse primer       | CAGGAAACAGCTATGACCYGCTYACCTCGCCKCTGCAC |
| Sequencing primer    | Sequence                               |
| Forward primer       | TGTAAACGACGGCCAGT                      |
| Reverse primer       | CAGGAAACAGCTATGACC                     |

**Supplementary Table 2.** HLA-DRB1 Genotypes frequencies.

| HLA-DRB1 genotypes | aPAP (N = 18),<br>no. (%) | HLA-DRB1 genotypes | sPAP (N = 10),<br>no. (%) |
|--------------------|---------------------------|--------------------|---------------------------|
| 08:03/14:54        | 4 (22.2)                  | 15:01/16:02        | 2 (20.0)                  |
| 08:03/14:05        | 1 (5.6)                   | 08:03/10:01        | 1 (10.0)                  |
| 13:12/14:54        | 1 (5.6)                   | 08:03/11:01        | 1 (10.0)                  |
| 09:01/10:01        | 1 (5.6)                   | 08:03/13:01        | 1 (10.0)                  |
| 04:05/08:03        | 1 (5.6)                   | 09:01/12:01        | 1 (10.0)                  |
| 09:01/14:54        | 1 (5.6)                   | 09:01/15:01        | 1 (10.0)                  |
| 03:01/08:03        | 1 (5.6)                   | 03:01/09:01        | 1 (10.0)                  |
| 01:01/04:03        | 1 (5.6)                   | 04:05/15:01        | 1 (10.0)                  |
| 08:03/13:12        | 1 (5.6)                   | 12:02/15:01        | 1 (10.0)                  |
| 15:01/16:02        | 1 (5.6)                   |                    |                           |
| 13:12/16:02        | 1 (5.6)                   |                    |                           |
| 11:06/12:02        | 1 (5.6)                   |                    |                           |
| 14:54/15:01        | 1 (5.6)                   |                    |                           |

| <b>HLA-DRB1 genotypes</b> | <b>aPAP (N = 18),<br/>no. (%)</b> | <b>HLA-DRB1 genotypes</b> | <b>sPAP (N = 10),<br/>no. (%)</b> |
|---------------------------|-----------------------------------|---------------------------|-----------------------------------|
| 07:01/08:03               | 1 (5.6)                           |                           |                                   |
| 11:01/16:02               | 1 (5.6)                           |                           |                                   |

aPAP = autoimmune pulmonary alveolar proteinosis; sPAP = secondary pulmonary alveolar proteinosis.
